# Supplementary material
Source: PubMed Central journal article supplement (PMC7316092)
Supplement: NIHMS1600170-supplement-Sup_Table_1.pdf [file NIHMS1600170-supplement-Sup_Table_1.pdf]

**Supplementary Table 1: Individual library peptides positive in CD8<sup>+</sup> T cell epitope screen.**

| Protein                  | Amino Acids              | Sequence (15-mer)       | Protein                      | Amino Acids                | Sequence (15-mer)        |
|--------------------------|--------------------------|-------------------------|------------------------------|----------------------------|--------------------------|
| SH                       | 41-55                    | LNKLCEYNVFNHNTF         | M                            | 26-40                      | DDDPASLTIWVPMFQ          |
|                          | 46-60                    | EYNVFNHNTFELPRA         |                              | 66-80                      | KGPSLRVMINSRSAV          |
|                          | 50-64                    | FHNKTFELPRARVNT         |                              | 101-115                    | KLAYDVTTTPEIKAC          |
| P                        | 11-25                    | EDANNRATKFLESIK         |                              | <b>106-120<sup>b</sup></b> | <b>VTTTPE(IKACSLTCL)</b> |
|                          | 16-30                    | RATKFLESIKGKFTS         |                              | <b>111-125<sup>b</sup></b> | <b>E(IKACSLTCL)KSKNM</b> |
|                          | 31-45                    | PKDPKKKDSIISVNS         |                              | 136-150                    | TLNPTHDIILCEFE           |
|                          | 51-65                    | TKESPITSNSTIINP         |                              | 146-160                    | LCEFENIVTSKQVII          |
|                          | 56-70                    | ITSNSTIINPTNETD         |                              | <b>181-195<sup>c</sup></b> | <b>TTTEFK(NAITNAKII)</b> |
|                          | 76-90                    | KPNYQRKPLVSFKED         |                              | <b>186-200<sup>c</sup></b> | <b>K(NAITNAKII)PYSGL</b> |
|                          | 91-105                   | PTPSDNPFSKLYKET         |                              | <b>191-205<sup>c</sup></b> | <b>(NAKII)PYSGLLLVIT</b> |
|                          | 96-110                   | NPFSKLYKETIETFD         | 221-235                      | QFIVDLGAYLEKESI            |                          |
|                          | 121-135                  | EEINDQTNDNITARL         | <b>M2-2</b>                  | 21-35                      | LITSRRCRVMTMYNQKN        |
|                          | 126-140                  | QTNDNITARLDRIDE         | L                            | 276-290                    | SLSRLNVCLITWISN          |
|                          | 131-145                  | ITARLDRIDEKLSEI         |                              | 386-400                    | KTVSDNIINGRWIIL          |
|                          | 136-150                  | DRIDEKLSEILGMLH         |                              | 426-440                    | FRIFGHPMVDERQAM          |
|                          | 141-155                  | KLSEILGMLHTLVVA         |                              | 466-480                    | IYRIIKGFVNNYNRW          |
|                          | 151-165                  | TLVVASAGPTSARDG         |                              | 491-505                    | LRWLTYKLNTPSL            |
|                          | 156-170                  | SAGPTSARDGIRDAM         |                              | 501-510                    | TYPSELTERDLIV            |
|                          | 161-175                  | SARDGIRDAMIGLRE         |                              | 506-515                    | LELTERDLIVLSGLR          |
|                          | 166-180                  | IRDAMIGLREEMIEK         |                              | 526-540                    | RLPKKVDLEMIINDK          |
| 171-185                  | IGLREEMIEKIRTEA          | 536-550                 |                              | IINDKAISPPKNLIW            |                          |
| 176-190                  | EMIEKIRTEALMTND          | 546-560                 |                              | KNLIWTSFPRNYMPS            |                          |
| 181-195                  | IRTEALMTNDRLEAM          | 576-590                 |                              | SDKSRRVLEYLRDN             |                          |
| 206-220                  | MAKDTSDVSLNPTS           | 586-600                 |                              | YLRDNKFNECDLYNC            |                          |
| 221-235                  | EKLNNLLEGNDSDND          | 596-610                 |                              | DLYNCVWQSYLNNP             |                          |
| NS2                      | 16-30                    | TDMRPLSLETIITSL         |                              | 616-630                    | LTGKERELSVGRMFA          |
|                          | 21-35                    | LSLETIITSLTRDII         |                              | 626-640                    | GRMFAMQPGMFRQVQ          |
|                          | 36-40                    | THKFIYLINHECIVR         |                              | 666-680                    | ELQKILELKAGISNK          |
|                          | 56-70                    | QATFTFLVNYEMKLL         |                              | 701-715                    | LSKFNQAFRYETSCI          |
|                          | 61-75                    | FLVNYEMKLLHKVGS         |                              | 706-720                    | QAFRYETSCICSDVL          |
|                          | 66-80                    | EMKLLHKVGSTKYKK         |                              | 736-750                    | TIPHVTIICTYRHAP          |
|                          | 96-110                   | FINHDGFLECIKIP          | 771-785                      | RYHMGGIEGW CQKLW           |                          |
| NS1                      | 101-115                  | GFLECIKIPKHTP           | 821-835                      | IRLMEGQTHAQADYL            |                          |
|                          | 31-45                    | TDKLIHLTNALAKAV         | <b>2016-2030<sup>d</sup></b> | <b>IFPVF(NVVQNAKLI)L</b>   |                          |
|                          | <b>61-75<sup>a</sup></b> | <b>TSSD(ICPNNIVV)KS</b> | <b>2021-2035<sup>d</sup></b> | <b>(NVVQNAKLI)LSRTKN</b>   |                          |
| <b>66-80<sup>a</sup></b> | <b>(CPNNIVV)KSNFTTM</b>  |                         |                              |                            |                          |
| 116-130                  | KLSDSTMTNYMNQLS          |                         |                              |                            |                          |

<sup>a</sup>Library peptides containing the entire or partial sequence of the confirmed CD8<sup>+</sup> T cell epitope NS1<sub>65-73</sub>.

<sup>b</sup>Library peptides containing the entire sequence of the confirmed CD8<sup>+</sup> T cell epitope M<sub>112-120</sub>.

<sup>c</sup>Library peptides containing the entire or partial sequence of the previously defined CD8<sup>+</sup> T cell epitope M<sub>187-195</sub> (11).

<sup>d</sup>Library peptides containing the entire sequence of the confirmed CD8<sup>+</sup> T cell epitope L<sub>2021-2029</sub>.

( ) Denotes 9-mer minimal core epitope sequences.
